# Supplementary material for: Reproducibility and Concordance of Differential DNA Methylation and Gene Expression in Cancer
Source: PLoS One. 2012 Jan 3;7(1):e29686. doi: 10.1371/journal.pone.0029686 (PMC3250460; doi:10.1371/journal.pone.0029686)
Supplement: Table S3 — GO terms significantly enriched with Hypomethylation genes separately for Lung squamous cell carcinoma and Stomach adenocarcinoma. (XLS) [file pone.0029686.s003.xls]

## Sheet: Sheet1
Function terms of hypomethylation genes
Lung cancer(LUSC) (FDR <5%)
GO:0006953	acute-phase response
GO:0050832	defense response to fungus
GO:0042742	defense response to bacterium
GO:0007186	G-protein coupled receptor protein signaling pathway
GO:0006968	cellular defense response
GO:0008228	opsonization
GO:0015721	bile acid and bile salt transport
GO:0031581	hemidesmosome assembly
GO:0031622	positive regulation of fever
GO:0031640	killing of cells of another organism
GO:0033089	positive regulation of T cell differentiation in the thymus
GO:0050995	negative regulation of lipid catabolic process
Stomach cancer (FDR <5%)
GO:0042742	defense response to bacterium
GO:0031424	keratinization
